# Supplementary figures and images for: Comparison of gel contraction mediated by airway smooth muscle cells from patients with and without asthma
Source: HighWire-hosted journal article supplement (doi:10.1136/thx.2006.070474), 2007-04-06

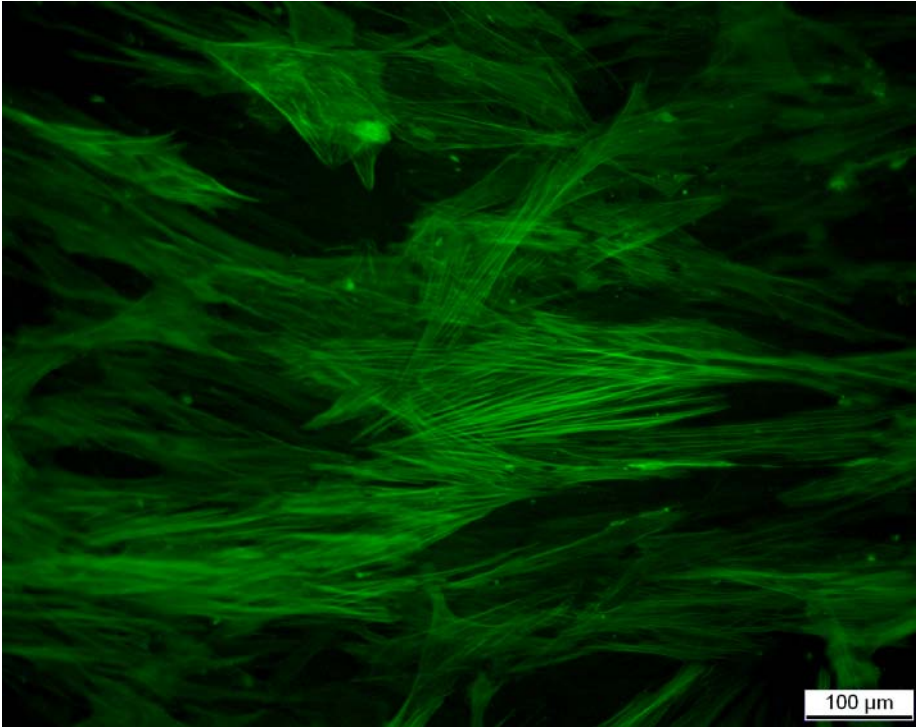

Non-asthma

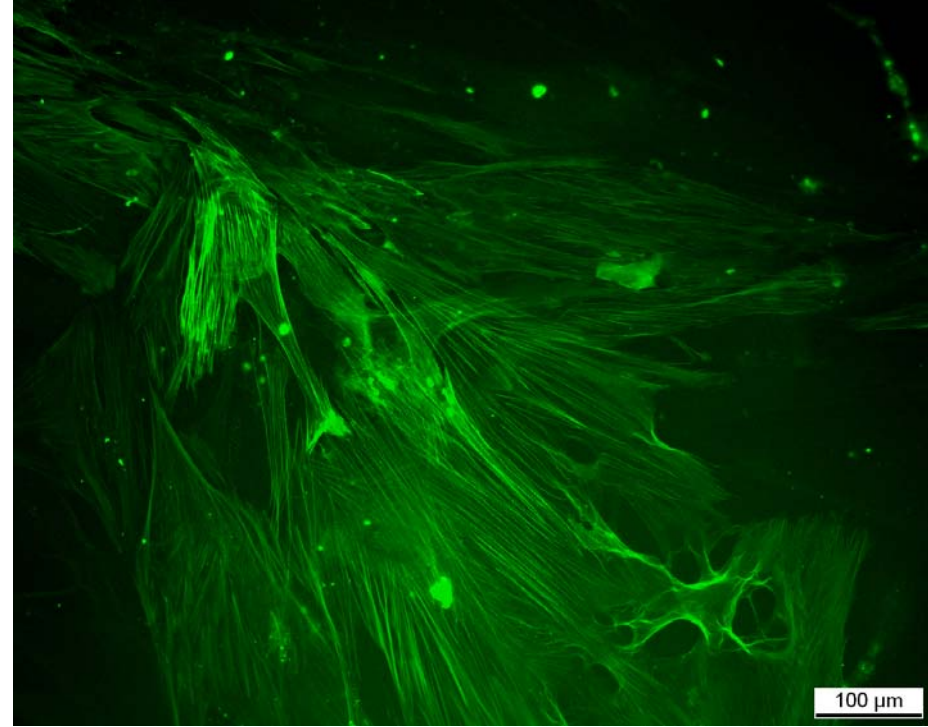

Asthma

Figure E1

Supplement: 6210848fige1.pdf [file 6210848fige1.pdf]
